# Supplementary material for: An efficient bi-functional permselective separator coated with cubic type-Li7La3Zr2O12and activated carbon for lithium–sulfur batteries
Source: Royal Society of Chemistry journal article supplement (doi:10.1039/d0se00594k), 2020-01-01
Supplement: d0se00594k1.pdf [file d0se00594k1.pdf]

## Supporting Information

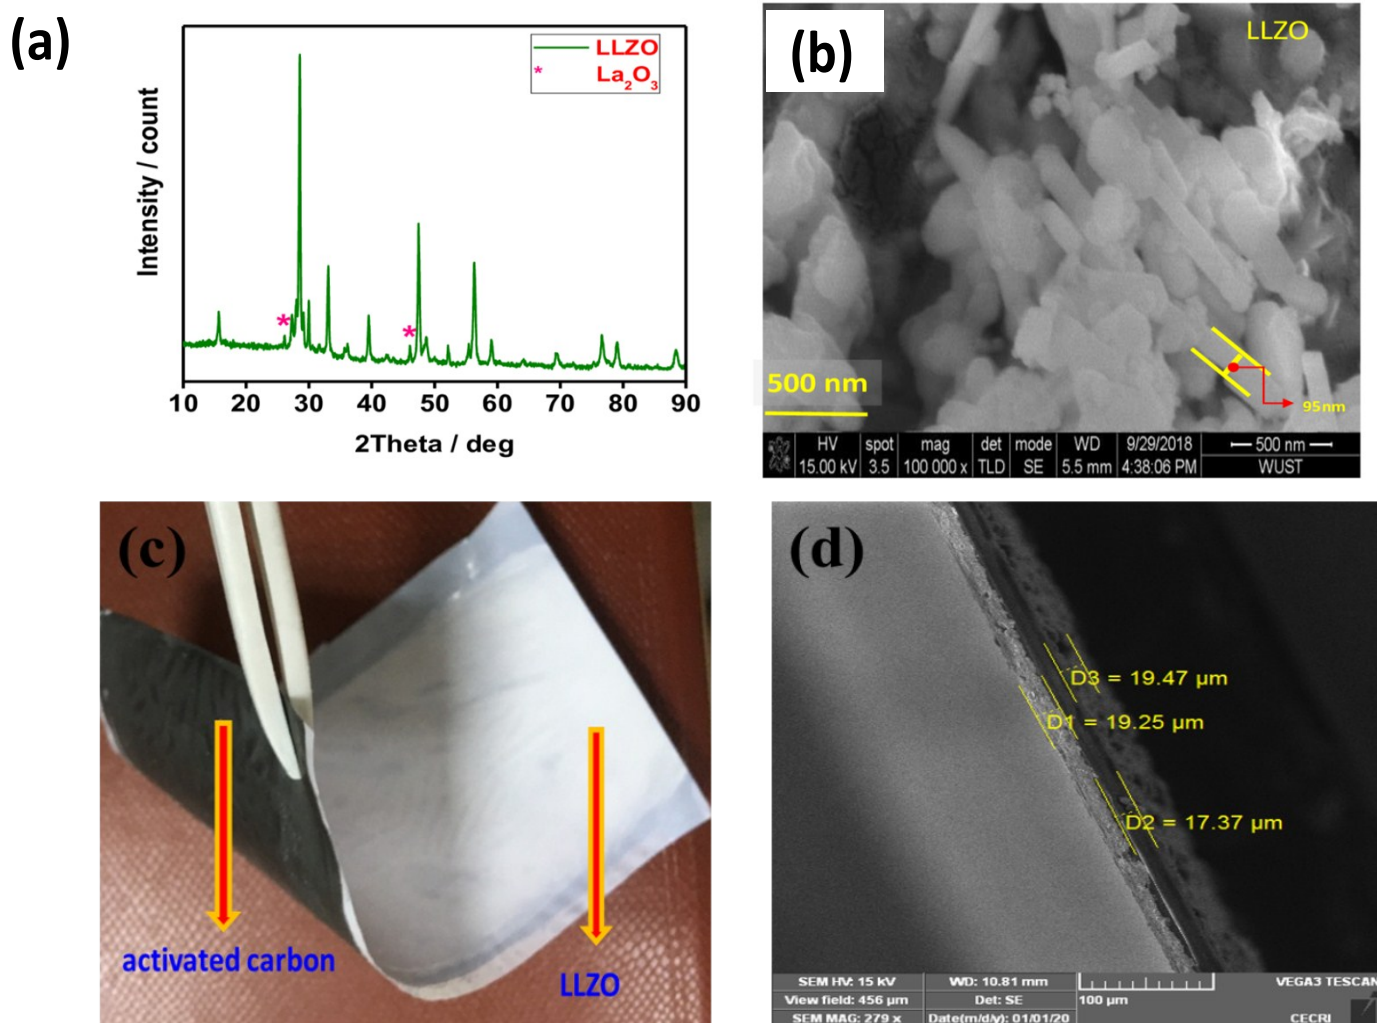

Figure SI 1. (a) XRD patterns of  $\text{Li}_7\text{La}_3\text{Zr}_2\text{O}_{12}$  \* indicates  $\text{La}_2\text{O}_3$  impurity phase (b) SEM image  $\text{Li}_7\text{La}_3\text{Zr}_2\text{O}_{12}$  (c) Flexible trilayer membrane (d) Cross-sectional SEM

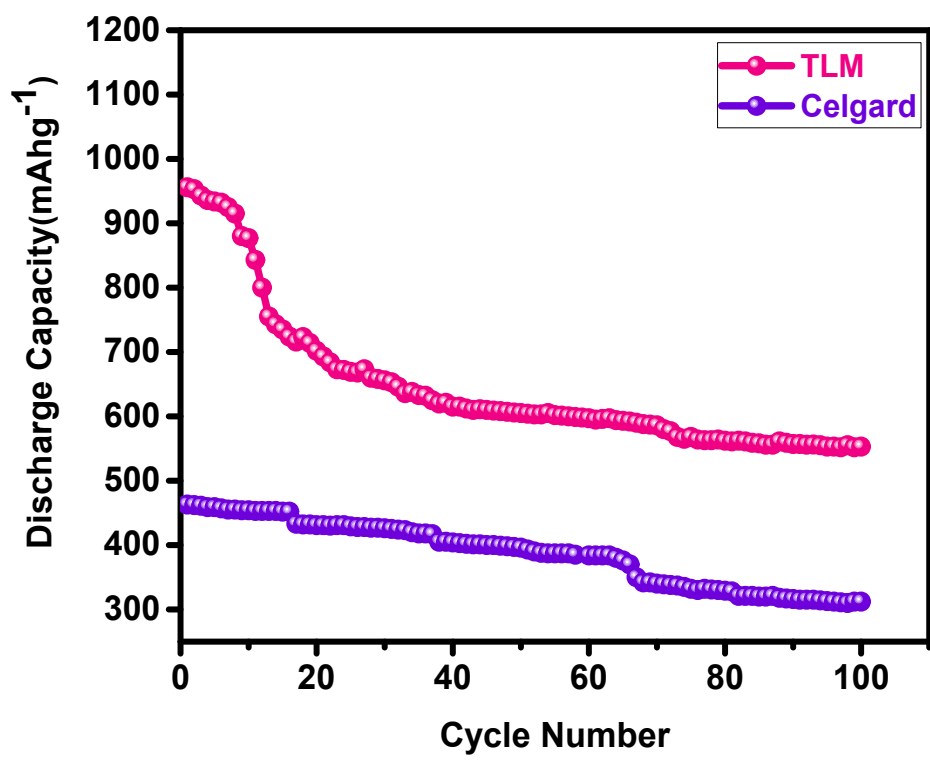

Figure SI 2. Discharge capacity vs. cycle number for Li S cell with trilayer membrane at

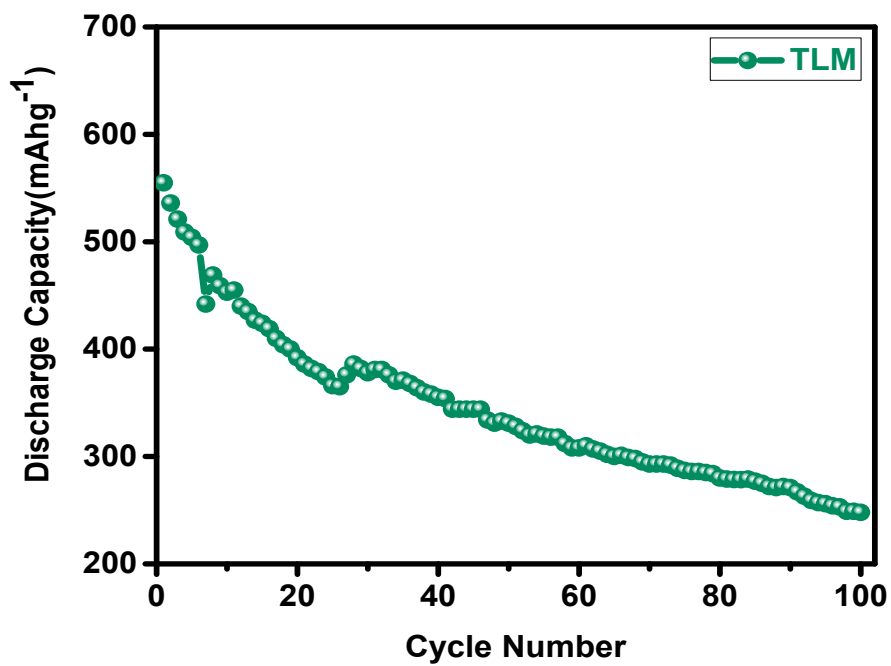

Figure SI 3. Discharge capacity vs. cycle number for Li S cell with trilayer membrane at 0.2C- rate (Trilayer membrane with Li<sub>7</sub>La<sub>3</sub>Zr<sub>2</sub>O<sub>12</sub> facing cathode while activated)

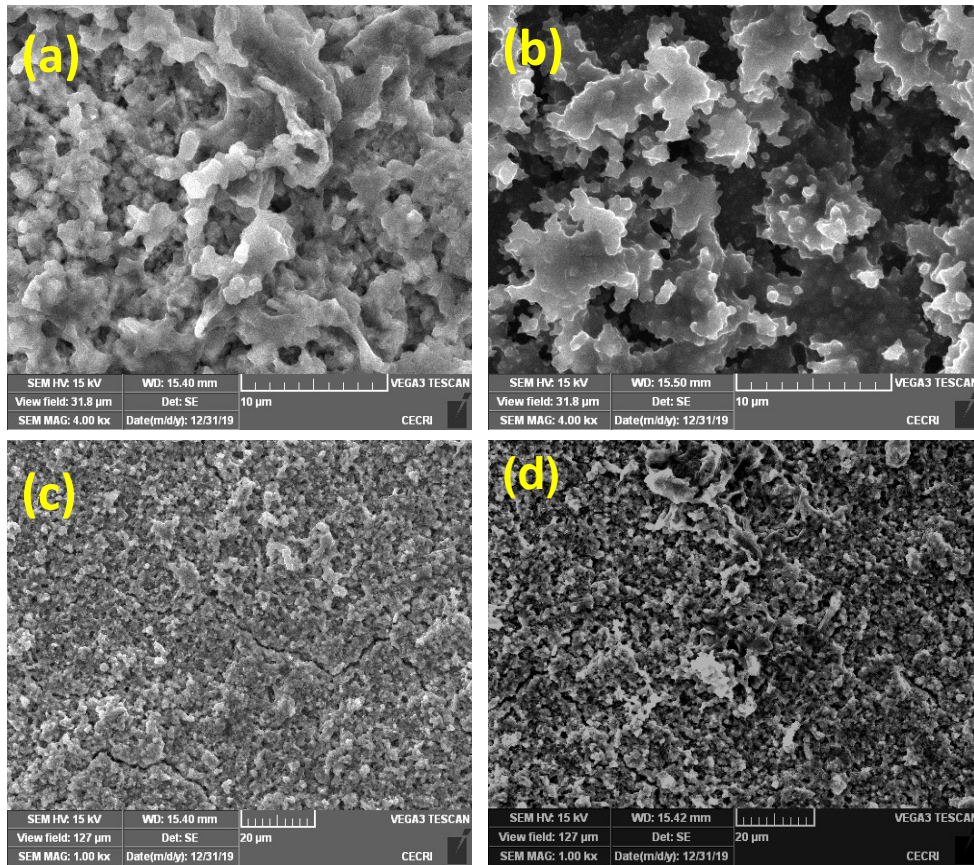

Figure SI 4. SEM images of  $\text{Li}_7\text{La}_3\text{Zr}_2\text{O}_{12}$  (a) before cycling (b) after cycling

SI 5 .Table 1. Comparison of permselective trilayer membranes properties with the present system

| S.No | S - content (wt%) | Mass loading of S electrode (mg/cm <sup>2</sup> ) | Thickness of the coating layer (μm) | Mass of the coating layer (mg/cm <sup>2</sup> ) | Initial discharge capacity (mAh/g) | Reversible discharge capacity (mAh/g) | Number of cycles | Current density | Degradation rate per cycle (%) | Reference |
|------|-------------------|---------------------------------------------------|-------------------------------------|-------------------------------------------------|------------------------------------|---------------------------------------|------------------|-----------------|--------------------------------|-----------|
| 1    | 75                | 0.75                                              | 25                                  | 1.32                                            | 1067.7                             | 804.4                                 | 100              | 0.2 C           | 1.3                            | <b>1</b>  |
| 2    | 80                | 2.5(areal loading)                                | 35                                  | 1                                               | 1110.4                             | 801.6                                 | 300              | 0.5             | NA                             | <b>2</b>  |
| 3    | 60                | 1.4                                               | 8                                   | 0.01                                            | 1020                               | 709                                   | 100              | 0.2             | 0.3                            | <b>3</b>  |
| 4    | 63                | 1.5                                               | 20                                  | 0.12                                            | 920                                | NA                                    | 100              | 0.1             | 0.49 to 0.23                   | <b>4</b>  |
| 5    | 60                | 1                                                 | 25                                  | 0.5                                             | 836                                | 610                                   | 200              | 0.1             | 0.1                            | <b>5</b>  |
| 6    | 72                | 0.72                                              | 47                                  | 0.8                                             | 1370                               | 620                                   | 100              | 0.1             | 2.20                           | <b>6</b>  |
| 7    | 80                | 1                                                 | NA                                  | NA                                              | 1045                               | 628                                   | 50               | 0.05            | 1.6                            | <b>7</b>  |
| 8    | 42                | 1                                                 | 42                                  | NA                                              | 1287                               | 807.8                                 | 100              | 0.2             | 1.60                           | <b>8</b>  |
| 9    | 80                | 0.7                                               | 20                                  | 0.825                                           | 1382                               | 924                                   | 200              | 0.1             | 1.4                            | <b>9</b>  |
| 10   | 70                | 1.7                                               | 35                                  | 0.9                                             | 1382                               | 1015                                  | 200              | 0.2             | 0.1                            | <b>10</b> |
| 11   | 80                | 0.9 and 4.5(areal loading)                        | 36                                  | 0.8                                             | 956                                | 553                                   | 100              | 0.2             | 1.9                            | <b>11</b> |

## References

1. R.Song.et.al.,*J. of Power Sources*,2016, **301**, 179-186.
2. G.Ma,et.al.,*J. Mater. Chem. A*, 2016, **4**,16968.
3. A.Manthiram ,et.al.,*J. Mater. Chem. A*, 2015, **3**,18829-18834.
4. F.We,et.al.,*ACS Nano* ,2015,**9**,3,3002-3011.
5. Y.Cuiet.al.,*Energy Environ.Sci.*,2014,**7**,3381-3390.

6. A.M.Stephan,et.al.,*Inorg.chem.front.*,2017,**4**,1013-1021.
7. Z.Luo,et.al.,*ACS Appl.Mater.Interfaces* ,2018,**10**,6,5534-5542.
8. H.F.Xiang,et.al., *Ionics* ,2015, **21**,981–986.
9. S.H.Yeon et.al.,*J.Mater.Chem.A*,2015,**3**,9461-9467.
10. L.Giebeler,et.al.,*J.Phys.Chem.C* ,2015,**119**,94580-4587.
- 11.The present work.
